# Supplementary material for: Identification and characterization of intact glycopeptides in human urine
Source: PubMed Central journal article supplement (PMC10866872; doi:10.1038/s41598-024-53299-3), 2024-02-14

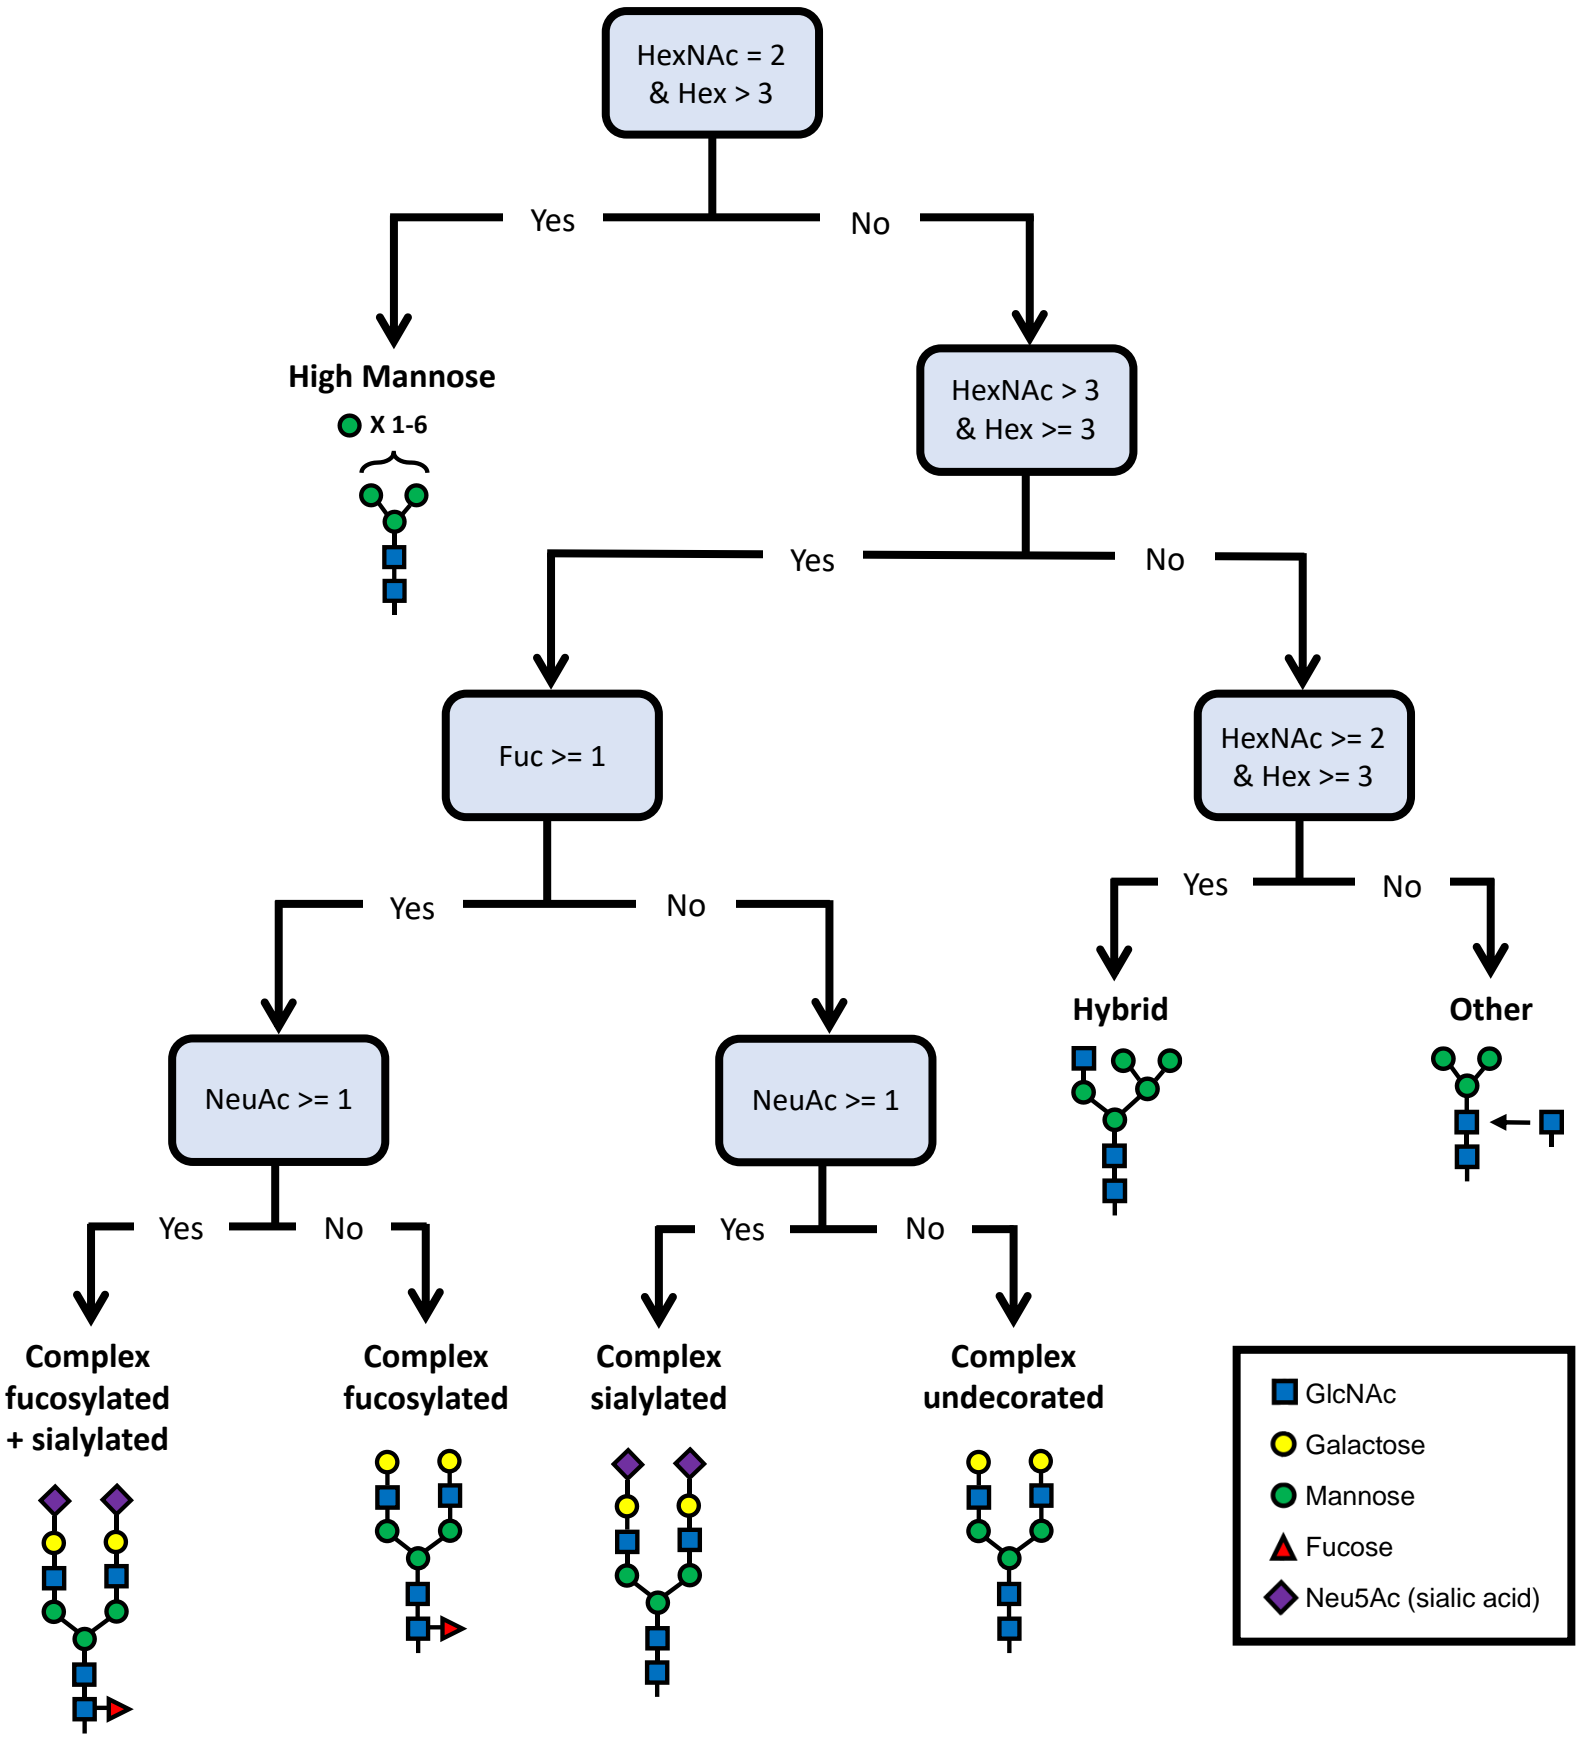

Supplement: 41598_2024_53299_MOESM1_ESM.pdf [file 41598_2024_53299_MOESM1_ESM.pdf]
